# Supplementary material for: Human C1orf27 protein interacts with α2A-adrenergic receptor and regulates its anterograde transport
Source: PubMed Central journal article supplement (PMC9168726; doi:10.1016/j.jbc.2022.102021), 2022-05-10
Supplement: mmc1.pdf [file mmc1.pdf]

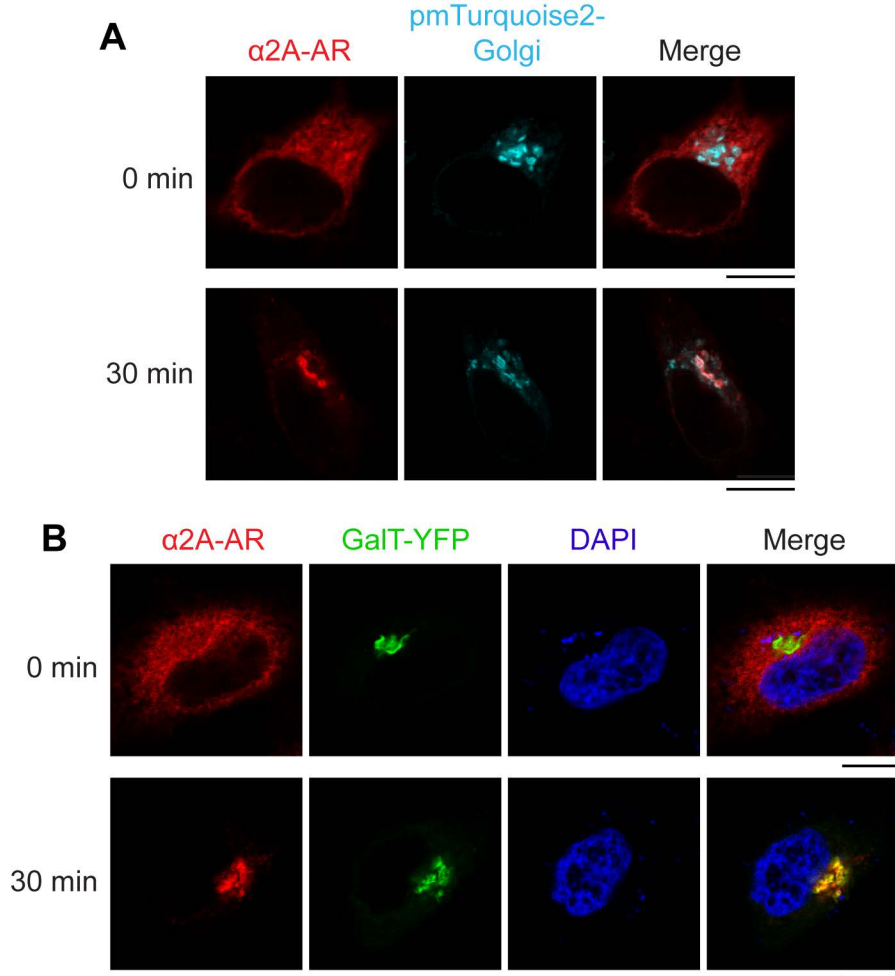

**Fig. S1. Colocalization of  $\alpha$ 2A-AR with the Golgi markers.** HeLa cells were transfected with Str-KDEL\_SBP-mCherry- $\alpha$ 2A-AR together with pmTurquoise2-Golgi (A) or GalT-YFP (B) for 20 h and fixed at 30 min after addition of botin. Images shown are representatives of three individual experiments. Scale bars, 10  $\mu$ m.

**A**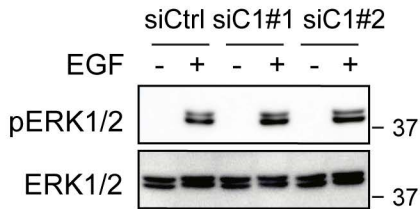**B**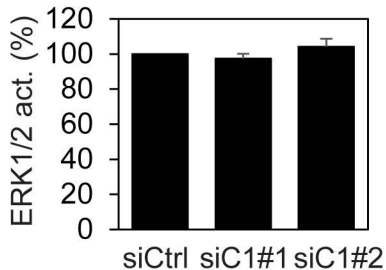

**Fig. S2. Effect of siRNA-mediated knockdown of C1orf27 on ERK1/2 activation by EGF.** A, Western blots showing that C1orf27 knockdown had no effect on ERK1/2 activation by EGF. HEK293 cells were transfected with control siRNA or siRNA targeting C1orf27 and stimulated by EGF at 50 ng/ml for 5 min. B, Quantitative data shown in A. The data are mean  $\pm$  SE (n = 3).
